# Supplementary material for: A new general approach to synthesizing filled and yolk–shell structured metal oxide microspheres by applying a carbonaceous template
Source: Royal Society of Chemistry journal article supplement (doi:10.1039/c7nr06231a), 2017-01-01
Supplement: c7nr06231a1.pdf [file c7nr06231a1.pdf]

## Supporting Information

### **A new general approach to synthesizing filled and yolk-shell structured metal oxide microspheres by applying a carbonaceous template**

Young Jun Hong,<sup>a</sup> Kwang Chul Roh,<sup>b</sup> Jung-Kul Lee\*<sup>c</sup> and Yun Chan Kang\*<sup>a</sup>

<sup>a</sup>Department of Materials Science and Engineering, Korea University, Anam-Dong, Seongbuk-Gu, Seoul 136-713, Republic of Korea. E-mail: yckang@korea.ac.kr

<sup>b</sup>Energy and Environmental Division Korea Institute of Ceramic Engineering and Technology (KICET) Jinju, Gyeongnam 52851, Republic of Korea.

<sup>c</sup>Department of Chemical Engineering Konkuk University Hwayang-dong, Gwangjin-gu Seoul 143-701, Republic of Korea. E-mail: jkrhee@konkuk.ac.kr

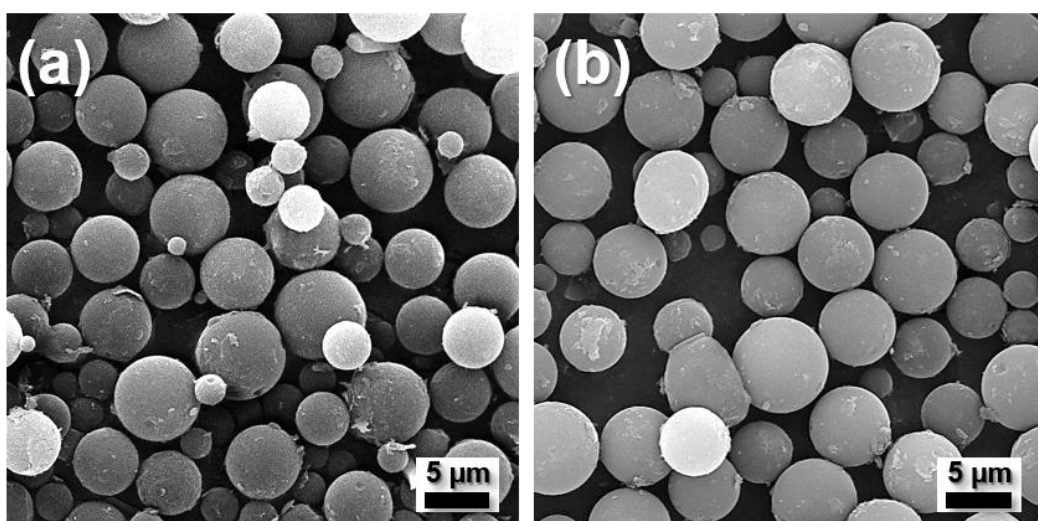

**Fig. S1** SEM images of the carbonaceous template microspheres (a) before and (b) after impregnation of  $\text{Sn}(\text{Oct})_2$  at the loading rate of 0.3 mL.

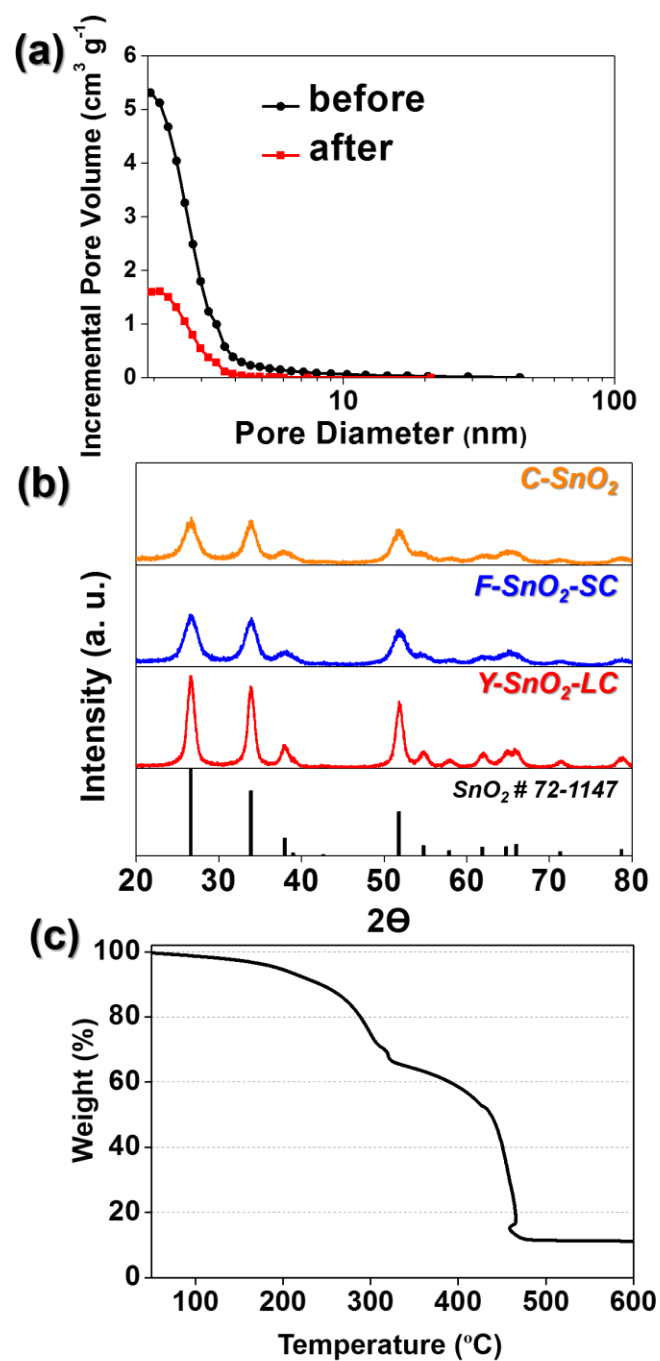

**Fig. S2** (a) BJH pore size distributions of the carbon template microspheres before and after Sn(Oct)<sub>2</sub> impregnation, (b) XRD patterns of the C-SnO<sub>2</sub> and filled and yolk-shell structured SnO<sub>2</sub> microspheres, and (c) TG curve of the C-Sn(Oct)<sub>2</sub> composite microspheres measured under air atmospheres.

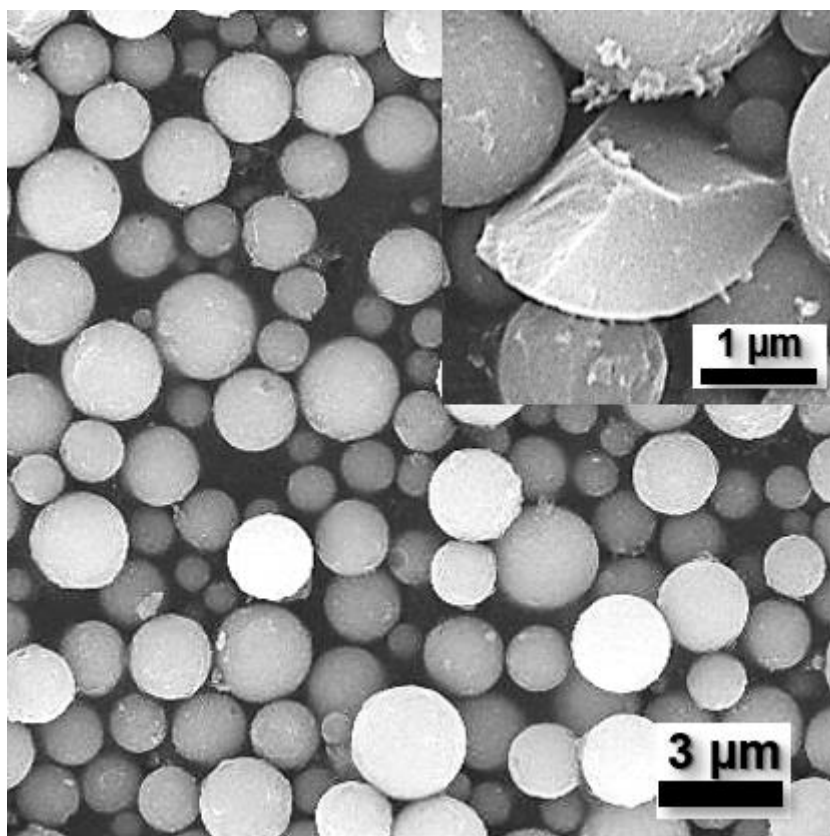

**Fig. S3** Morphologies of the SnO<sub>2</sub> microspheres obtained by post-treatment of the C-SnO<sub>2</sub> microsphere (shown in Fig. 1) in an atmosphere with high oxygen concentration and ramping rate of 10 °C min<sup>-1</sup> s.

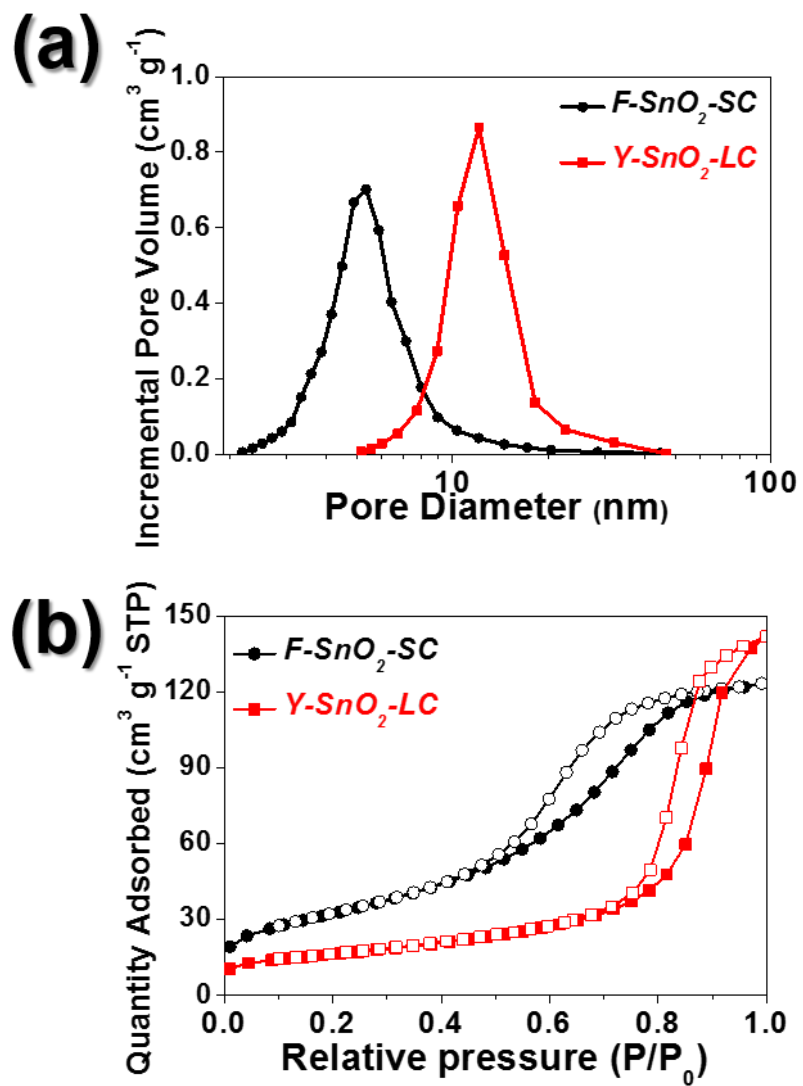

**Fig. S4** (a) BJH pore size distributions and (b) N<sub>2</sub> adsorption and desorption isotherms of the yolk-shell and filled structured SnO<sub>2</sub> microspheres.

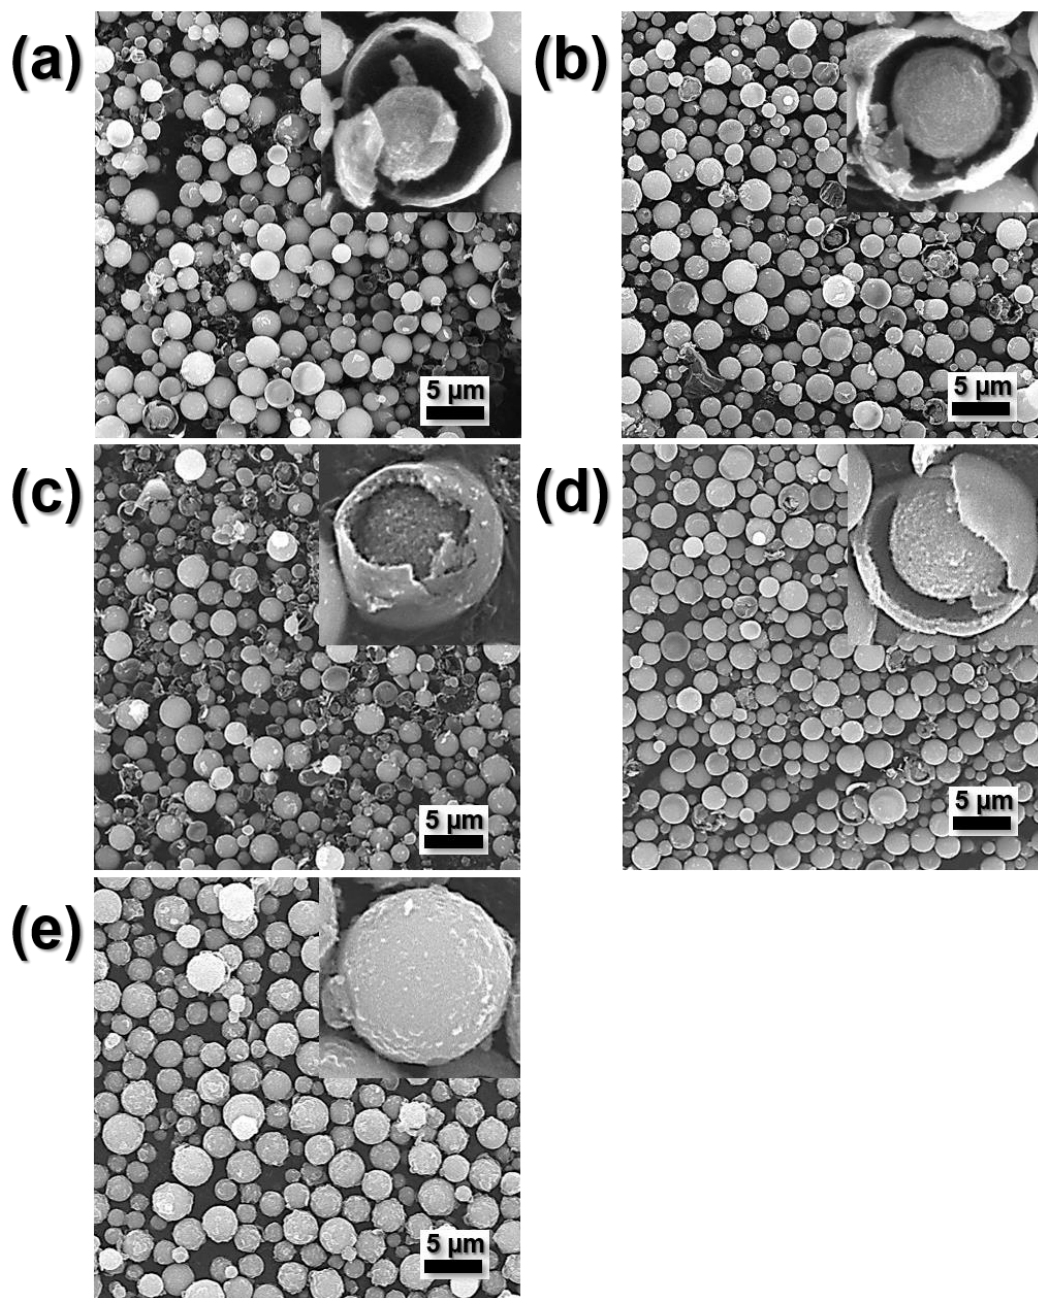

**Fig. S5** Morphologies of the SnO<sub>2</sub> microspheres prepared from the carbonaceous template microspheres with various loading rate of tin(II) octoate by post-treatment at 500 °C in an atmosphere with high oxygen concentration and ramping rate of 10 °C min<sup>-1</sup>: (a) 0.2 ml, (b) 0.4 ml, (c) 0.6 ml, (d) 1.0 ml, and (e) 1.5 ml.

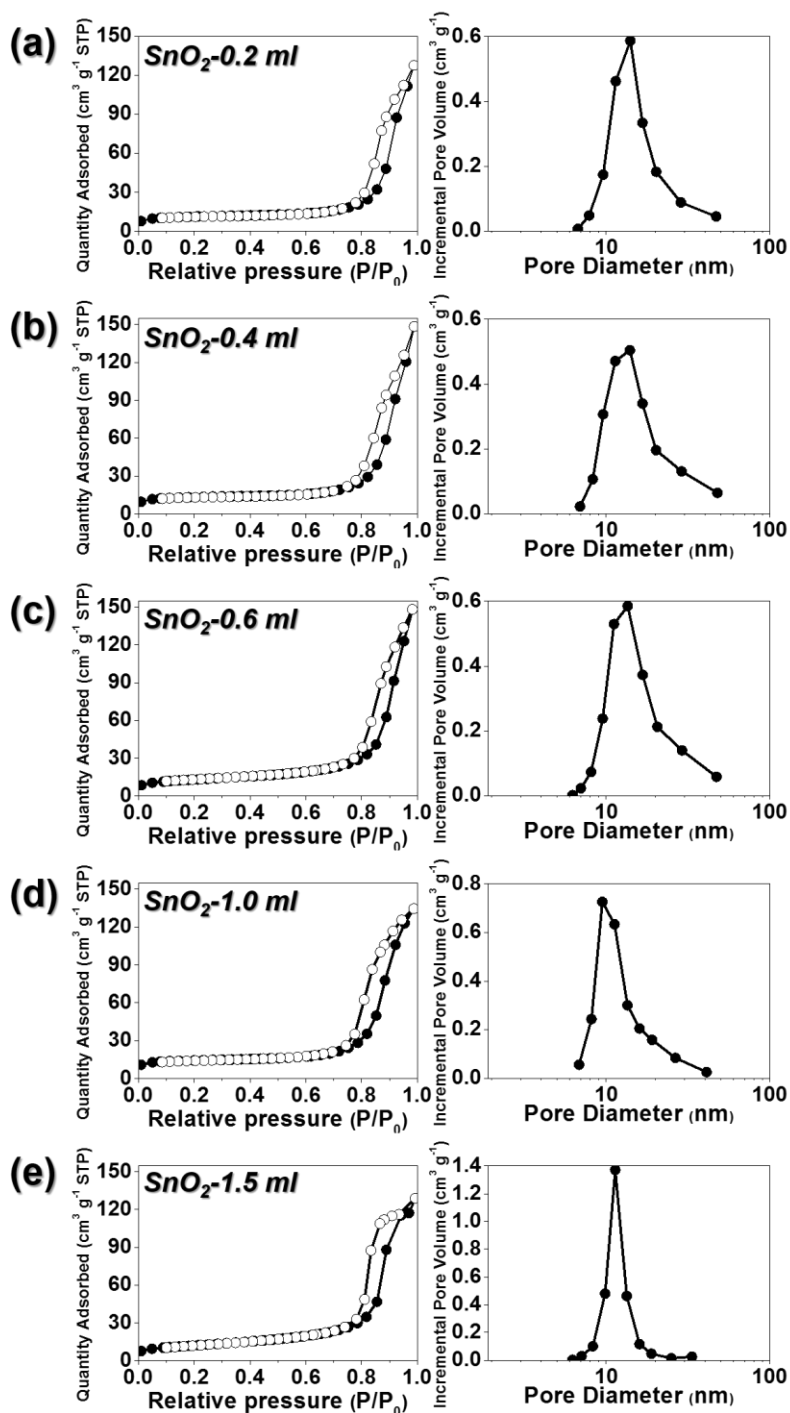

**Fig. S6** Nitrogen adsorption and desorption isotherms and BJH pore size distributions of the  $\text{SnO}_2$  microspheres formed from the carbonaceous template microspheres with various loading rate of tin(II) octoate by post-treatment at  $500^\circ\text{C}$  in an atmosphere with high oxygen concentration and ramping rate of  $10^\circ\text{C min}^{-1}$ : (a) 0.2 ml, (b) 0.4 ml, (c) 0.6 ml, (d) 1.0 ml, and (e) 1.5 ml.

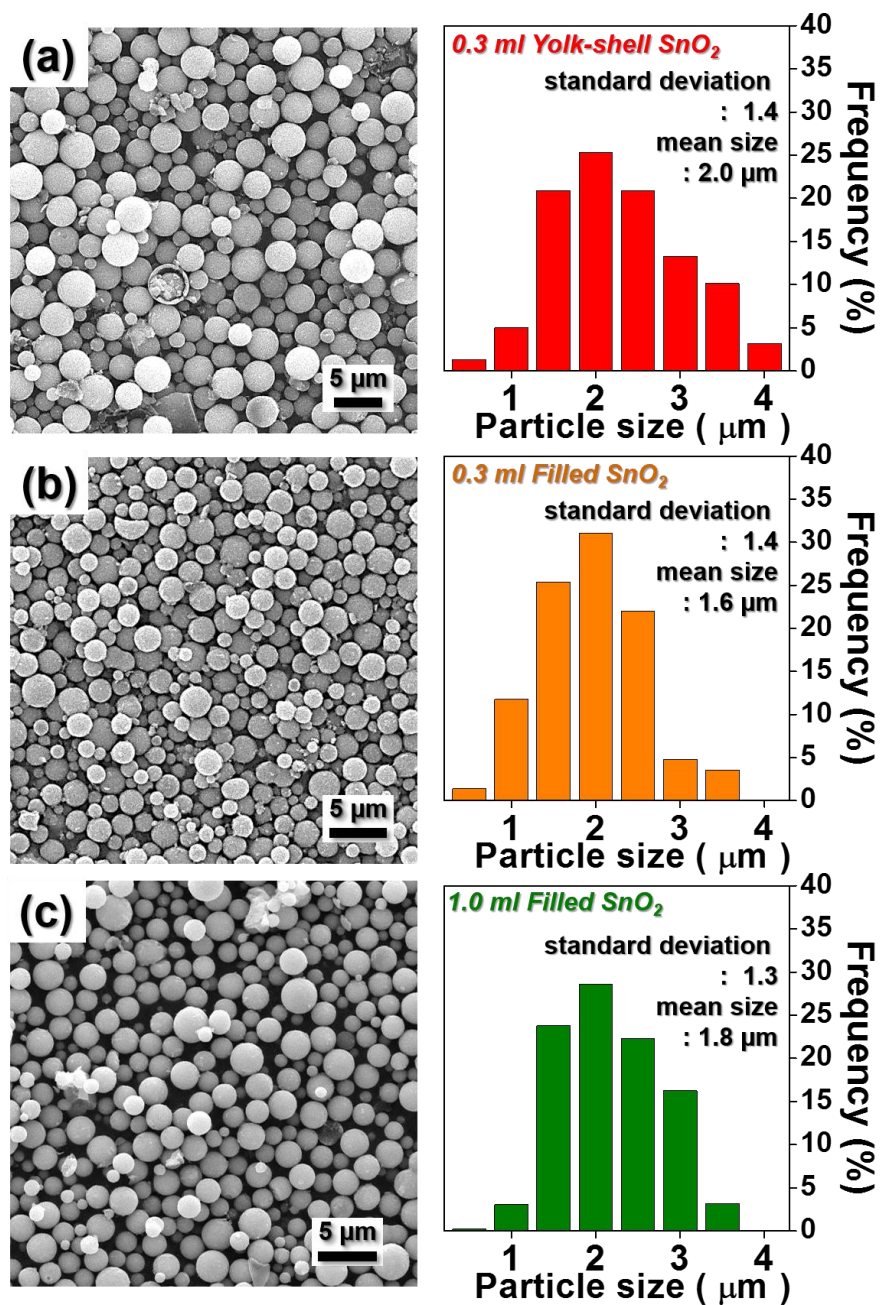

**Fig. S7** Morphologies and size distributions of the (a) filled and (b) yolk-shell structured  $\text{SnO}_2$  microspheres formed from the  $\text{C-Sn}(\text{Oct})_2$  microspheres with the loading rate of 0.3 mL, and (c) filled structured  $\text{SnO}_2$  microspheres formed from the  $\text{C-Sn}(\text{Oct})_2$  microspheres with loading rate of 1.0 mL.



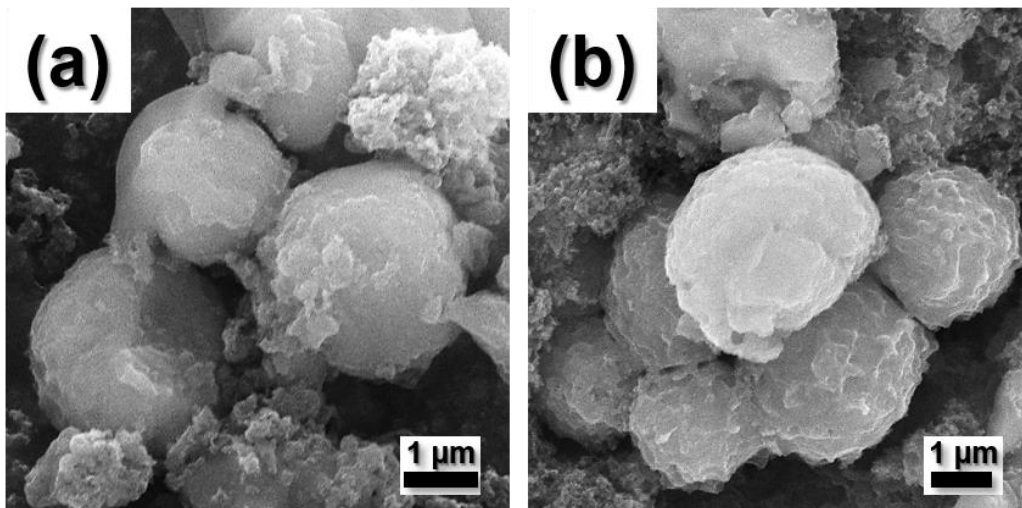

**Fig. S8** SEM images of the (a) Y-SnO<sub>2</sub>-LC and (b) F-SnO<sub>2</sub>-SC microspheres after 100 cycles.

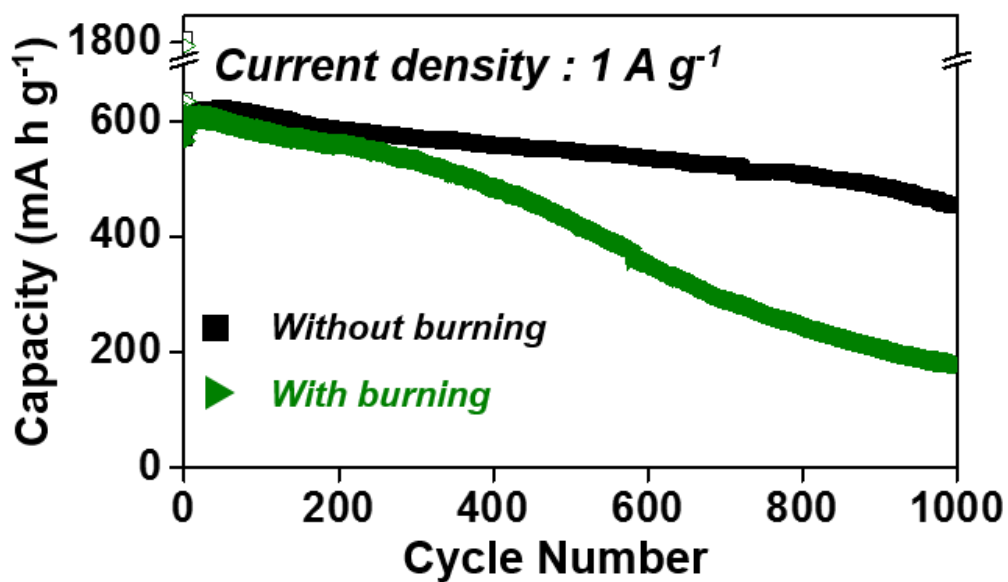

**Fig. S9** Cycling performances of the filled structured SnO<sub>2</sub> microspheres prepared by decomposition of the carbonaceous template with and without burning at a constant current density of 1 A g<sup>-1</sup>.

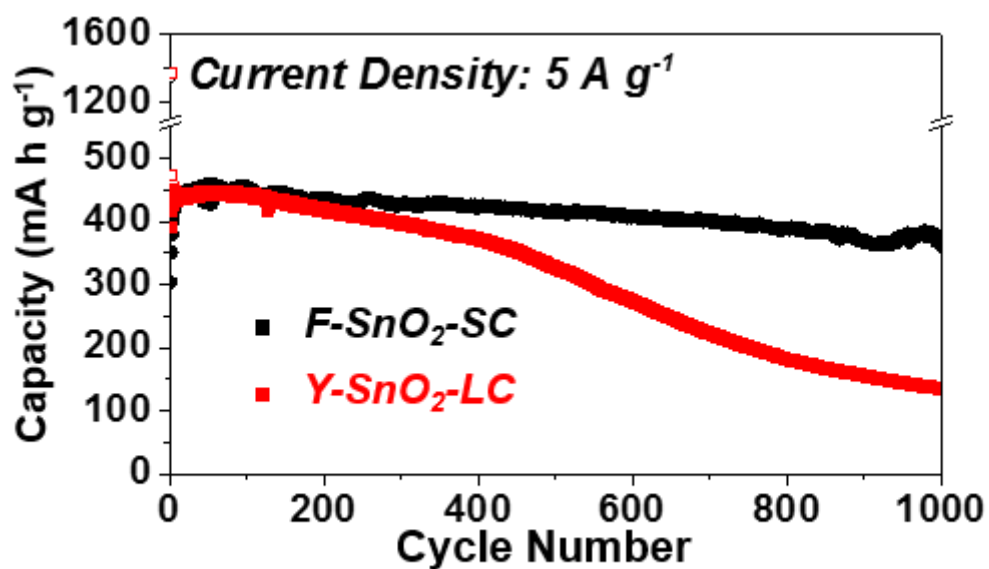

**Fig. S10** Cycling performances of the filled and yolk-shell structured SnO<sub>2</sub> microspheres formed from the C-Sn(Oct)<sub>2</sub> microspheres with the same loading rate of 0.3 mL at a constant current density of 5 A g<sup>-1</sup>.

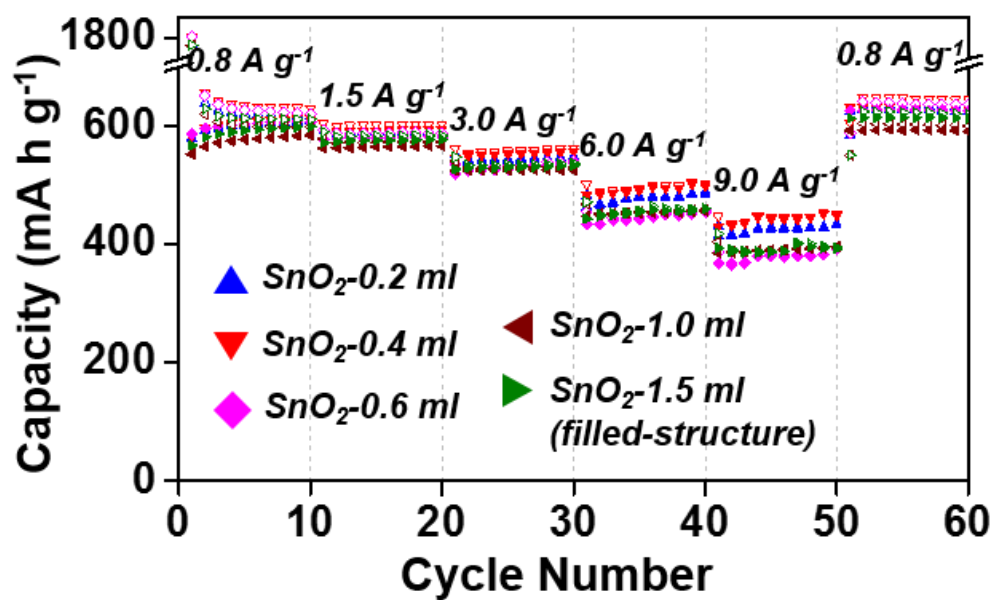

**Fig. S11** Rate performances of the SnO<sub>2</sub> microspheres prepared from the carbonaceous template microspheres with various loading rate of tin(II) octoate by post-treatment at 500 °C in an atmosphere with high oxygen concentration and ramping rate of 10 °C min<sup>-1</sup>.

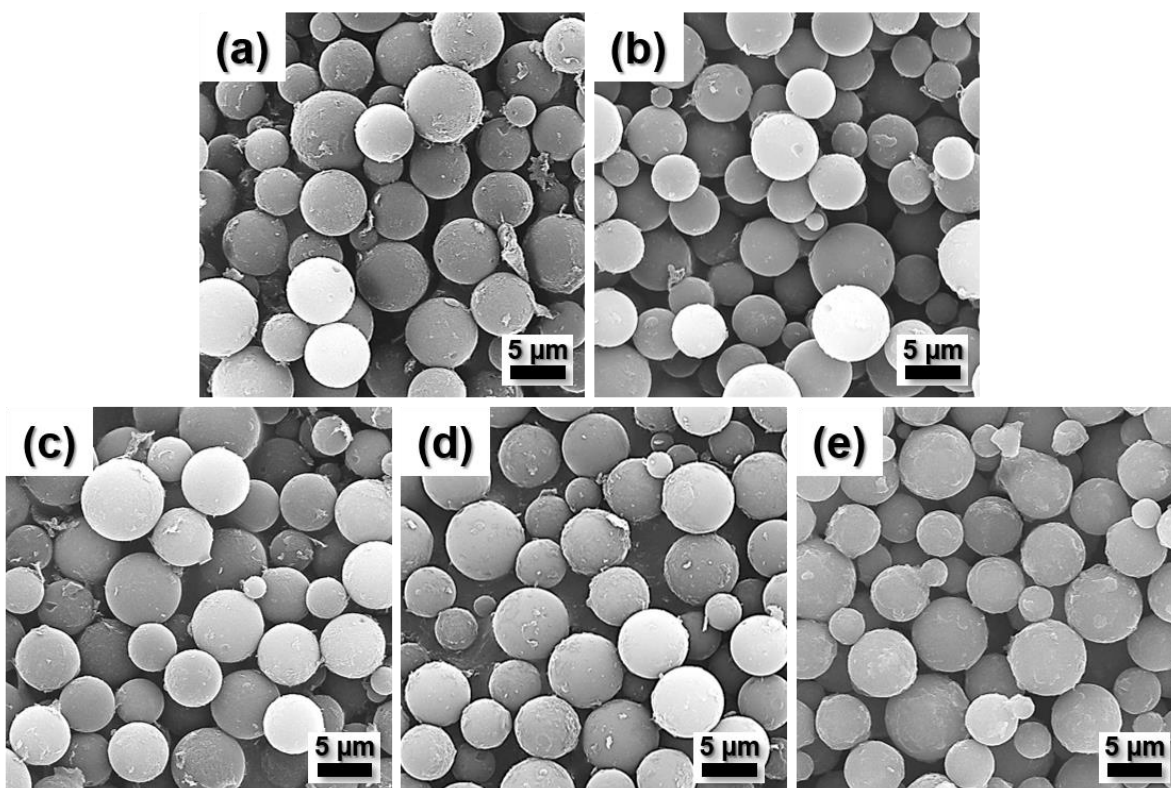

**Fig. S12** Morphologies of the carbonaceous template microspheres with various loading rate of tin(II) octoate: (a) 0.2 ml, (b) 0.4 ml, (c) 0.6 ml, (d) 1.0 ml, and (e) 1.5 ml.

**Table S1.** Cycling and rate performances of various nanostructured SnO<sub>2</sub> materials in lithium-ion batteries.

| Various hollow SnO <sub>2</sub> materials                                                       | cycling performance                                                                                           | rate performance                                                                                                                                      | Ref  |
|-------------------------------------------------------------------------------------------------|---------------------------------------------------------------------------------------------------------------|-------------------------------------------------------------------------------------------------------------------------------------------------------|------|
| <b>SnO<sub>2</sub>@carbon hollow spheres</b>                                                    | Discharge capacity of 643 mA h g <sup>-1</sup> after 300 cycles (at 0.5 A g <sup>-1</sup> , 0–3.0 V)          | The discharge capacities were 520 and 210 mA h g <sup>-1</sup> at current densities of 0.2 and 3.0 A g <sup>-1</sup> , respectively. (0–3.0 V)        | [57] |
| <b>SnO<sub>2</sub> hollow spheres</b>                                                           | Discharge capacity of 643 mA h g <sup>-1</sup> after 300 cycles (at 2.0 A g <sup>-1</sup> , 0.001–1.0 V)      | The discharge capacities were 780 and 597 mA h g <sup>-1</sup> at current densities of 0.5 and 7.0 A g <sup>-1</sup> , respectively. (0.001–1.0 V)    | [58] |
| <b>SnO<sub>2</sub> fiber-in-tube</b>                                                            | Discharge capacity of 640 mA h g <sup>-1</sup> after 300 cycles (at 1.0 A g <sup>-1</sup> , 0.001–1.0 V)      | The discharge capacities were 774 and 591 mA h g <sup>-1</sup> at current densities of 0.5 and 5.0 A g <sup>-1</sup> , respectively. (0.001–1.0 V)    | [59] |
| <b>Three-dimensional SnO<sub>2</sub>@TiO<sub>2</sub> double-shell nanotubes on carbon cloth</b> | Discharge capacity of 400 mA h g <sup>-1</sup> after 100 cycles (at 1.0 A g <sup>-1</sup> , 0.01–3.0 V)       | The discharge capacities were 843 and 135 mA h g <sup>-1</sup> at current densities of 0.16 and 7.8 A g <sup>-1</sup> , respectively. (0.01–3.0 V)    | [60] |
| <b>SnO<sub>2</sub>/C microspheres</b>                                                           | The discharge capacity 50 and 379 mA h g <sup>-1</sup> after 800 cycles. (at 0.1 A g <sup>-1</sup> , 0–3.0 V) | The discharge capacities were 378 and 230 mA h g <sup>-1</sup> at current densities of 0.1 and 0.6 A g <sup>-1</sup> , respectively. (0 – 3.0 V)      | [61] |
| <b>pillar arrays of C-coated hollow SnO<sub>2</sub></b>                                         | Discharge capacity of 488 mA h g <sup>-1</sup> after 50 cycles (at 1.0 A g <sup>-1</sup> , 0.005–2.0 V)       | The discharge capacities were 634 and 408 mA h g <sup>-1</sup> at current densities of 0.78 and 7.8 A g <sup>-1</sup> , respectively. (0.005 – 2.0 V) | [62] |
| <b>Carbon nanotube @SnO<sub>2</sub>-Au coaxial nanocable</b>                                    | Discharge capacity of 626 mA h g <sup>-1</sup> after 40cycles (at 0.18 A g <sup>-1</sup> , 0.05–1.2 V)        | The discharge capacities were 660 and 392 mA h g <sup>-1</sup> at current densities of 0.18 and 7.2 A g <sup>-1</sup> , respectively. (0.05 – 1.2 V)  | [63] |

**SnO<sub>2</sub>-C hollow nanostructures**

Discharge capacity of 577 mA h g<sup>-1</sup> after 500 cycles (at 0.2 A g<sup>-1</sup>, 0-3.0 V)

The discharge capacities were 701 and 412 mA h g<sup>-1</sup> at current densities of 0.4 and 5.0 A g<sup>-1</sup>, respectively. (0 – 3.0 V)

[64]

**Filled structured SnO<sub>2</sub> microspheres**

Discharge capacity of 450 mA h g<sup>-1</sup> after 1000 cycles (at 1 A g<sup>-1</sup>, 1.0 V)

The discharge capacities were 637 and 372 mA h g<sup>-1</sup> at current densities of **0.8 and 9.0 A g<sup>-1</sup>**, respectively. (0.01 – 1.0 V)

**This study**

---
